# Supplementary material for: Preparation and adsorption performance of cross-linked porous polycarbazoles
Source: Royal Society of Chemistry journal article supplement (doi:10.1039/c4ta01537a), 2014-01-01
Supplement: c4ta01537a1.pdf [file c4ta01537a1.pdf]

Electronic supplementary information

**Preparation and adsorption performance of  
cross-linked porous polycarbazoles**

Jian-Hua Zhu,<sup>a,b</sup> Qi Chen,<sup>b,\*</sup> Zhu-Yin Sui,<sup>b</sup> Long Pan,<sup>b</sup> Jiaguo Yu,<sup>a,\*</sup> Bao-  
Hang Han<sup>b,\*</sup>

*<sup>a</sup> State Key Laboratory of Advanced Technology for Material Synthesis and  
Processing, Wuhan University of Technology, Wuhan 430070, China*

*<sup>b</sup> National Center for Nanoscience and Technology, Beijing 100190, China*

Tel: +86 10 8254 5576; Email: [hanbh@nanoctr.cn](mailto:hanbh@nanoctr.cn)

Tel: +86 10 8254 5708; Email: [chenq@nanoctr.cn](mailto:chenq@nanoctr.cn)

Tel: +86 27 8787 1029; Email: [yujiaguo93@163.com](mailto:yujiaguo93@163.com)

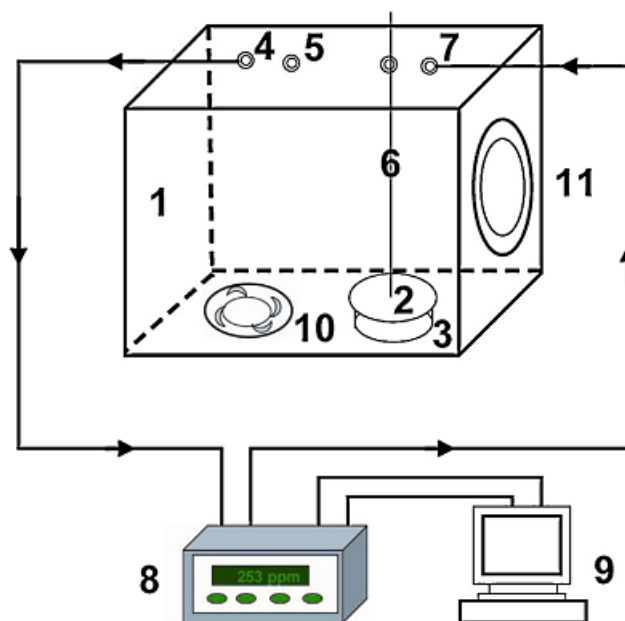

**Fig. S1.** Schematic diagram of experimental setup for room-temperature formaldehyde adsorption: (1) organic glass box, (2) glass slide cover, (3) glass petri dish with adsorbent, (4) sampling port, (5) injection port, (6) fine wire, (7) sample recovering port, (8) 1412 Photoacoustic IR Multigas Monitor, (9) computer, (10) fan and (11) door.

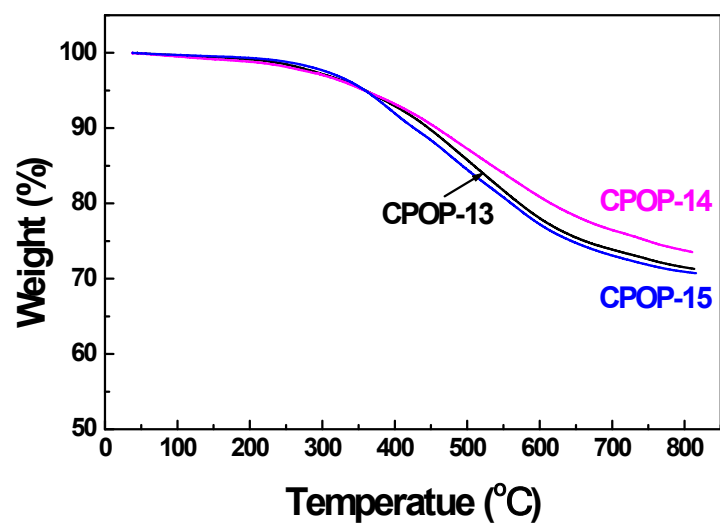

Fig. S2. TGA curves of CPOP-13, CPOP-14, and CPOP-15.

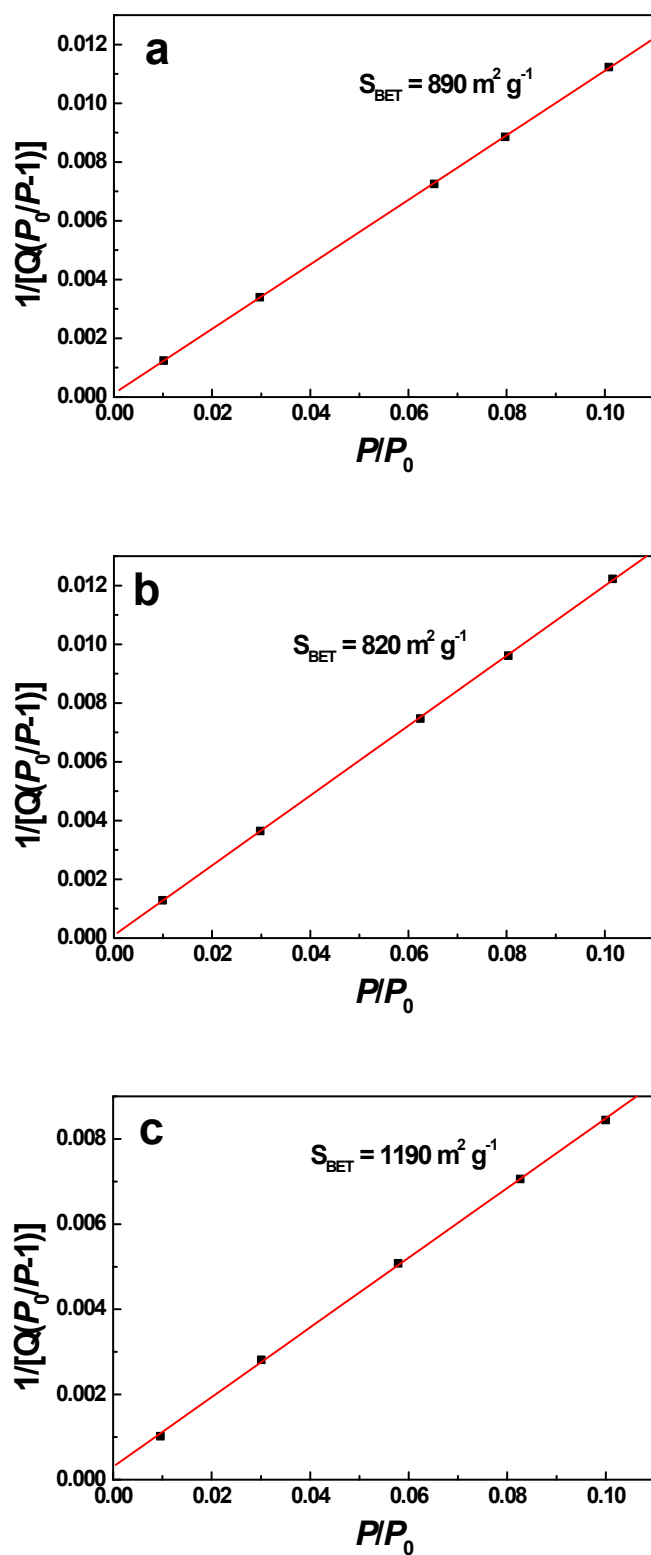

**Fig. S3.** The BET specific surface area plots of **CPOP-13** (a), **CPOP-14** (b) and **CPOP-15** (c) using relative pressure ranges  $(0.01 < P/P_0 < 0.1)$ .

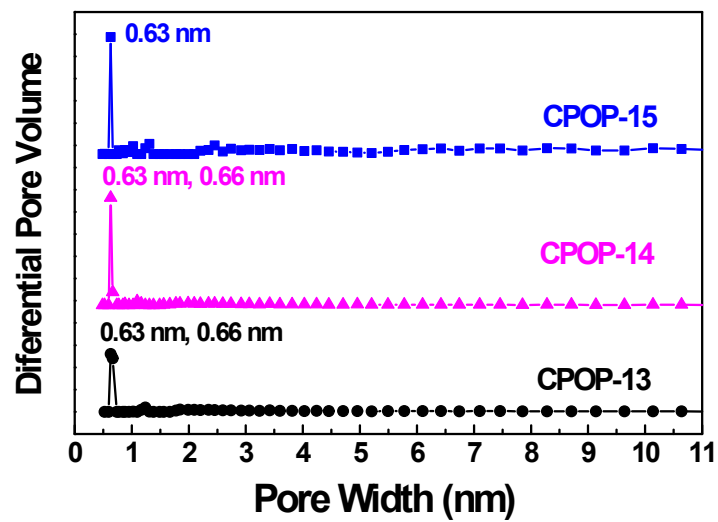

**Fig. S4.** The PSD profiles for CPOP-13, CPOP-14, and CPOP-15 calculated by NLDFIT.

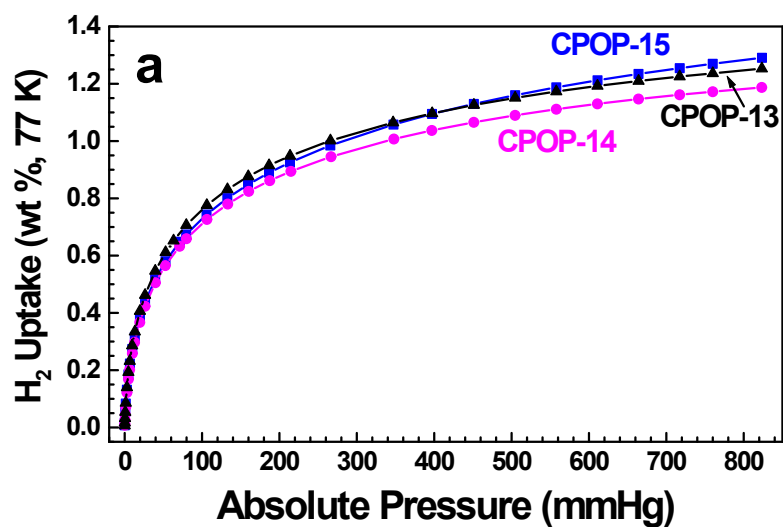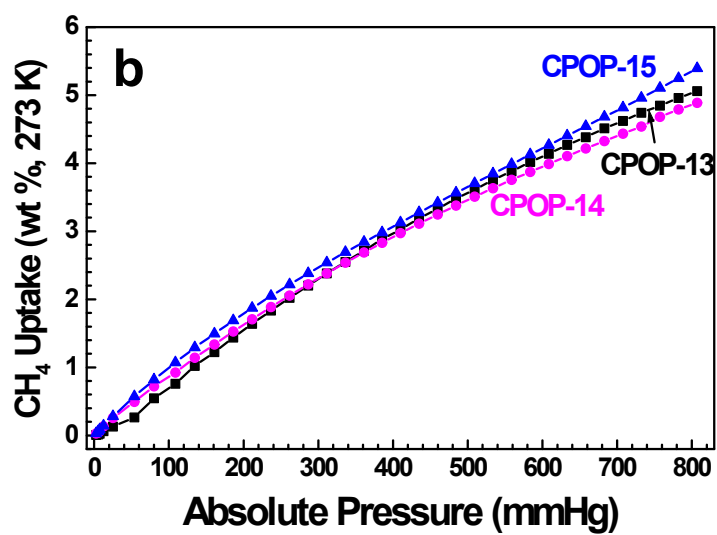

**Fig. S5.** Gas adsorption isotherms of the obtained CPOPs, (a) hydrogen at 77 K; (b) methane at 273 K.

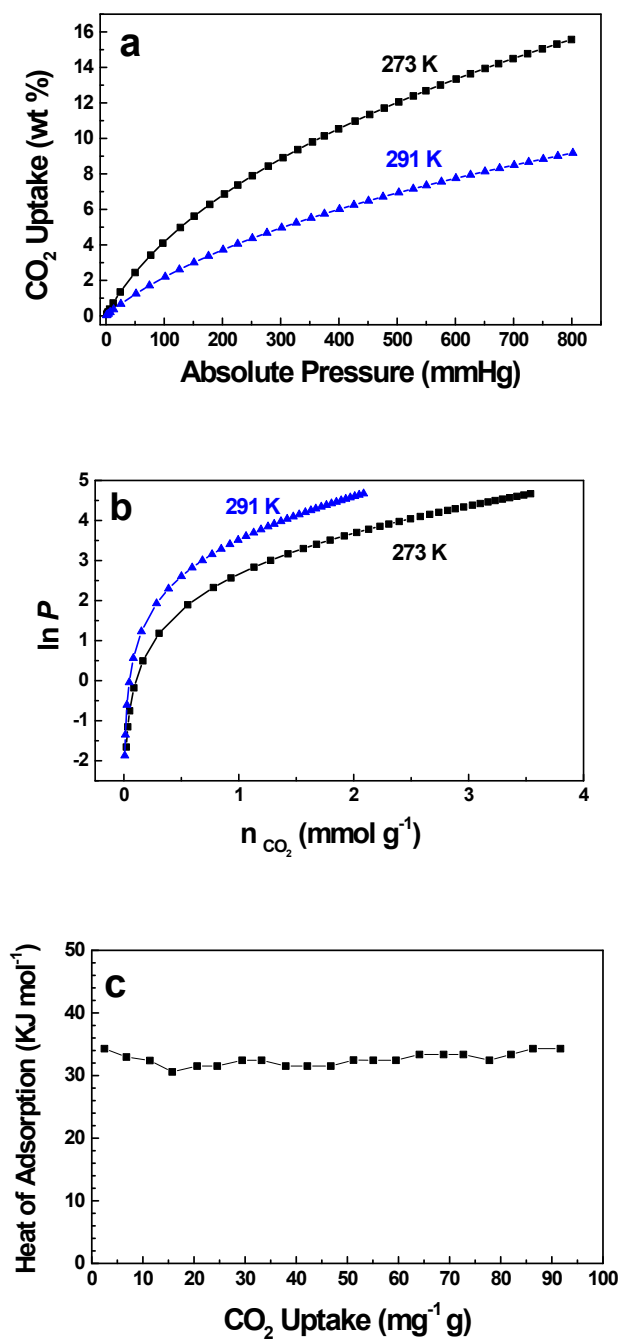

**Fig. S6.** Carbon dioxide adsorption isotherms of **CPOP-14** at different temperatures (273 and 291 K) (a), virial analysis of carbon dioxide adsorption data (273 and 291 K) (b), and isosteric heat of carbon dioxide adsorption for **CPOP-14** (c).

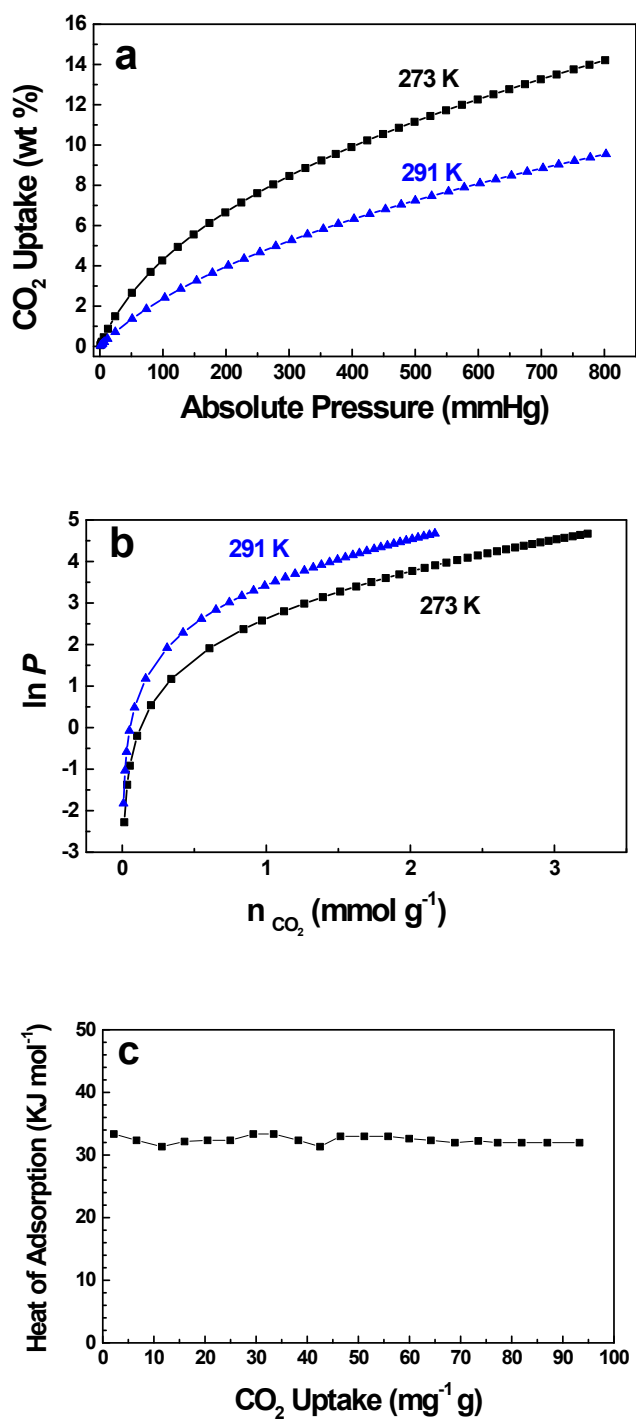

**Fig. S7.** Carbon dioxide adsorption isotherms of **CPOP-15** at different temperatures (273 and 291 K) (a), virial analysis of carbon dioxide adsorption data (273 and 291 K) (b), and isosteric heat of carbon dioxide adsorption for **CPOP-15** (c).



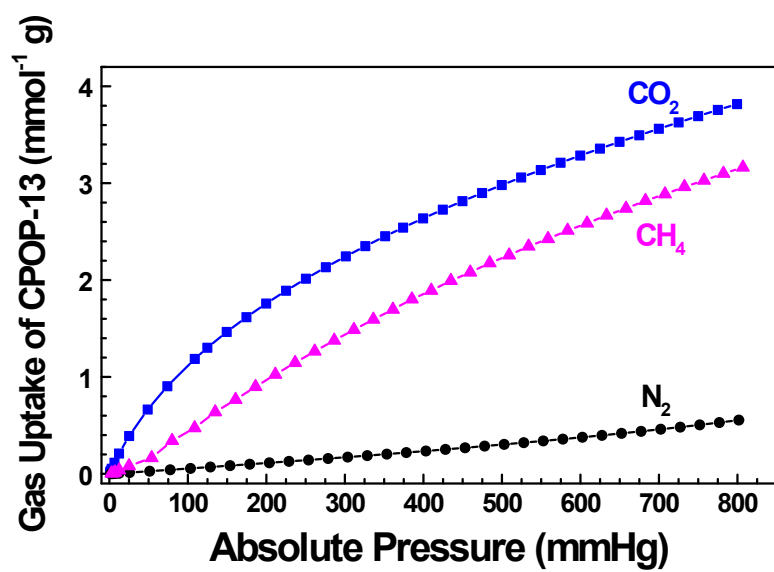

**Fig. S8.** Gas adsorption isotherms (carbon dioxide, methane and nitrogen) of CPOP-13 at 273 K.

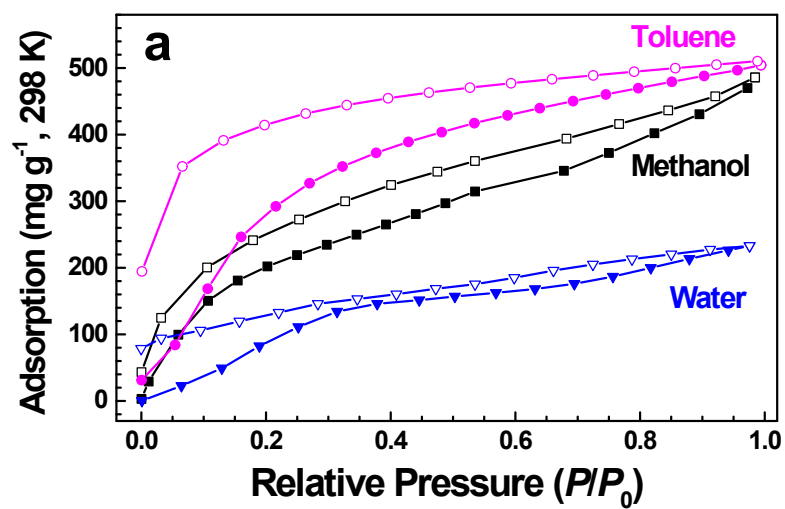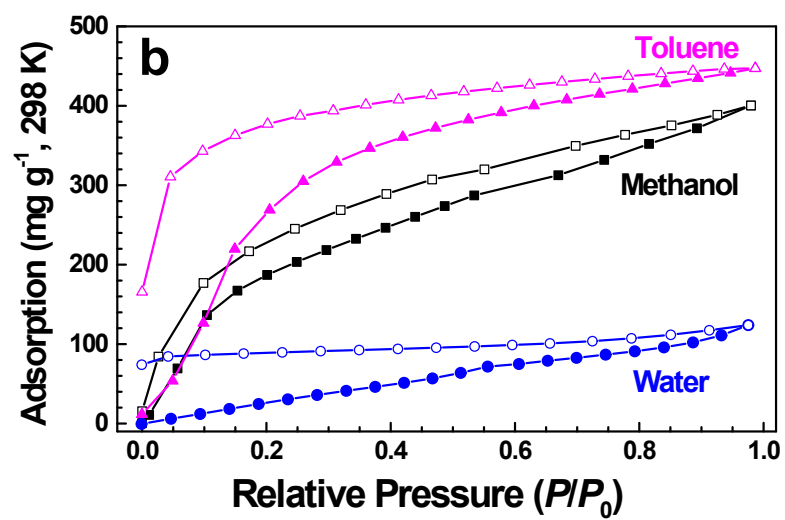

Fig. S9. Vapor adsorption isotherms of CPOP-13 (a) and CPOP-14 (b) at 298 K.
